# Supplementary material for: The transmission risk of multidrug-resistant organisms between hospital patients and their pets – a case−control study, Germany, 2019 to 2022
Source: PubMed Central journal article supplement (PMC11484343; doi:10.2807/1560-7917.es.2024.29.39.2300714), 2024-09-26
Supplement: 23-00714_HACKMANN_Supplement.pdf [file 23-00714_HACKMANN_Supplement.pdf]

## Supplement

### Supplementary tables and figures for univariable analyses, resistance pattern of isolates and DAGs created for multivariable analysis

This supplementary material is hosted by Eurosurveillance as supporting information alongside the article "The transmission risk of multidrug-resistant organisms (MDRO) between hospital patients and their pets – a case control study", on behalf of the authors, who remain responsible for the accuracy and appropriateness of the content. The same standards for ethics, copyright, attributions and permissions as for the article apply. Supplements are not edited by Eurosurveillance and the journal is not responsible for the maintenance of any links or email addresses provided therein.

**Table S1** - Distribution of collected data characteristics in the study cohort. BMI = Body Mass Index, CCI = Charlson Comorbidity Index, N = available data sets for each characteristic, \*Median (Interquartile range (IQR)).

| Characteristic                    | N     | Overall,<br>N = 2,891 | MDRO-Positive,<br>N = 871 | MDRO-Negative,<br>N = 2,020 |
|-----------------------------------|-------|-----------------------|---------------------------|-----------------------------|
| Sex                               | 2,891 |                       |                           |                             |
| Male                              |       | 1,608 (56%)           | 507 (58%)                 | 1,101 (55%)                 |
| Female                            |       | 1,282 (44%)           | 364 (42%)                 | 918 (45%)                   |
| Non-binary                        |       | 1 (<0.1%)             | 0 (0%)                    | 1 (<0.1%)                   |
| Age*                              | 2,891 | 63 (51, 73)           | 65 (53, 74)               | 61 (50, 72)                 |
| BMI*                              | 2,891 | 24.8 (22.0, 28.7)     | 24.5 (21.6, 28.3)         | 25.1 (22.2, 29.0)           |
| CCI*                              | 2,876 | 4 (2, 7)              | 4 (2, 7)                  | 4 (2, 6)                    |
| Diet                              | 2,888 |                       |                           |                             |
| Mixed diet                        |       | 2,747 (95%)           | 836 (96%)                 | 1,911 (95%)                 |
| Vegetarian                        |       | 99 (3.4%)             | 18 (2.1%)                 | 81 (4.0%)                   |
| Vegan                             |       | 12 (0.4%)             | 5 (0.6%)                  | 7 (0.3%)                    |
| Others                            |       | 30 (1.0%)             | 9 (1.0%)                  | 21 (1.0%)                   |
| Living situation                  | 2,888 |                       |                           |                             |
| Family/shared flat                |       | 2,041 (71%)           | 609 (70%)                 | 1,432 (71%)                 |
| Alone                             |       | 805 (28%)             | 239 (28%)                 | 566 (28%)                   |
| Nursing Home                      |       | 37 (1.3%)             | 18 (2.1%)                 | 19 (0.9%)                   |
| Others                            |       | 5 (0.2%)              | 2 (0.2%)                  | 3 (0.1%)                    |
| Prior hospitalization             | 2,878 | 1,764 (61%)           | 649 (75%)                 | 1,115 (55%)                 |
| Prior antibiotic use              | 2,815 | 1,187 (41%)           | 543 (62%)                 | 644 (32%)                   |
| Travel within Europe              | 2,890 | 403 (14%)             | 111 (13%)                 | 292 (14%)                   |
| Travel to Asia                    | 2,889 | 103 (3.6%)            | 46 (5.3%)                 | 57 (2.8%)                   |
| Travel to North America           | 2,889 | 24 (0.8%)             | 11 (1.3%)                 | 13 (0.6%)                   |
| Travel to South America           | 2,889 | 24 (0.8%)             | 11 (1.3%)                 | 13 (0.6%)                   |
| Travel to Africa                  | 2,889 | 24 (0.8%)             | 10 (1.1%)                 | 14 (0.7%)                   |
| Travel to Australia/New Zealand   | 2,889 | 2 (<0.1%)             | 0 (0%)                    | 2 (<0.1%)                   |
| Urinary tract catheter            | 2,888 | 291 (10%)             | 117 (13%)                 | 174 (8.6%)                  |
| Central venous catheter           | 2,888 | 612 (21%)             | 257 (30%)                 | 355 (18%)                   |
| Prior MDR-GNB colonization        | 2,434 | 148 (5.1%)            | 99 (11%)                  | 49 (2.4%)                   |
| Prior MRSA colonization           | 2,433 | 90 (3.1%)             | 61 (7.1%)                 | 29 (1.4%)                   |
| Prior VRE colonization            | 2,432 | 69 (2.4%)             | 42 (4.9%)                 | 27 (1.3%)                   |
| Diarrhea                          | 2,725 | 771 (27%)             | 280 (32%)                 | 491 (24%)                   |
| Pet ownership†                    | 2,890 | 626 (22%)             | 154 (18%)                 | 472 (23%)                   |
| Dog ownership                     | 2,890 | 360 (12%)             | 93 (11%)                  | 267 (13%)                   |
| Cat ownership                     | 2,890 | 333 (12%)             | 80 (9.2%)                 | 253 (13%)                   |
| Ownership of other pets           | 2,890 | 115 (4.0%)            | 36 (4.1%)                 | 79 (3.9%)                   |
| Regular contact to pets of others | 2,888 | 159 (5.5%)            | 32 (3.7%)                 | 127 (6.3%)                  |
| Number of dogs                    | 2,891 |                       |                           |                             |
| 0                                 |       | 2,532 (88%)           | 779 (89%)                 | 1,753 (87%)                 |
| 1                                 |       | 309 (11%)             | 83 (9.5%)                 | 226 (11%)                   |
| 2                                 |       | 38 (1.3%)             | 7 (0.8%)                  | 31 (1.5%)                   |
| 3 or more                         |       | 12 (0.4%)             | 2 (0.2%)                  | 10 (0.5%)                   |
| Number of cats                    | 2,891 |                       |                           |                             |
| 0                                 |       | 2,561 (89%)           | 793 (91%)                 | 1,768 (88%)                 |

| Characteristic                               | N     | Overall,<br>N = 2,891 | MDRO-Positive,<br>N = 871 | MDRO-Negative,<br>N = 2,020 |
|----------------------------------------------|-------|-----------------------|---------------------------|-----------------------------|
| 1                                            |       | 222 (7.7%)            | 54 (6.2%)                 | 168 (8.3%)                  |
| 2                                            |       | 80 (2.8%)             | 16 (1.8%)                 | 64 (3.2%)                   |
| 3 or more                                    |       | 28 (1.0%)             | 8 (0.9%)                  | 20 (1.0%)                   |
| Professional contact to livestock or<br>pets | 2,882 | 163 (5.7%)            | 43 (5.0%)                 | 120 (6.0%)                  |
| Heart disease                                | 2,876 | 257 (8.9%)            | 82 (9.5%)                 | 175 (8.7%)                  |
| Cerebrovascular disease                      | 2,876 | 195 (6.8%)            | 62 (7.2%)                 | 133 (6.6%)                  |
| Neurologic disease                           | 2,876 | 51 (1.8%)             | 23 (2.7%)                 | 28 (1.4%)                   |
| Lung disease                                 | 2,876 | 251 (8.7%)            | 65 (7.5%)                 | 186 (9.2%)                  |
| Rheumatic disease                            | 2,876 | 102 (3.5%)            | 28 (3.2%)                 | 74 (3.7%)                   |
| Gastrointestinal disease                     | 2,876 | 24 (0.8%)             | 11 (1.3%)                 | 13 (0.6%)                   |
| Liver disease                                | 2,876 | 163 (5.7%)            | 54 (6.2%)                 | 109 (5.4%)                  |
| Diabetes                                     | 2,876 | 450 (16%)             | 144 (17%)                 | 306 (15%)                   |
| Renal disease                                | 2,876 | 672 (23%)             | 263 (30%)                 | 409 (20%)                   |
| Cancer/immunological disease                 | 2,876 | 1,074 (37%)           | 371 (43%)                 | 703 (35%)                   |

**Table S2** Resistance pattern of isolates from participating hospital patients, n = 985. ESBL = Extended Spectrum Beta-Lactamase.

|                                     | Total      | Methicillin<br>resistant | Vancomycin<br>resistant | 3 <sup>rd</sup> Generation<br>Cephalosporine<br>resistant | ESBL positive | Fluoroquinolone<br>resistant | Carbapenem<br>resistant |
|-------------------------------------|------------|--------------------------|-------------------------|-----------------------------------------------------------|---------------|------------------------------|-------------------------|
| <b>Staphylococci</b>                |            |                          |                         |                                                           |               |                              |                         |
| <i>Staphylococcus aureus</i>        | 118        | 118                      | -                       | -                                                         | -             | -                            | -                       |
| <b>Enterococci</b>                  |            |                          |                         |                                                           |               |                              |                         |
| <i>Enterococcus faecium</i>         | 273        | -                        | 273                     | -                                                         | -             | -                            | -                       |
| <i>Enterococcus faecalis</i>        | 4          | -                        | 4                       | -                                                         | -             | -                            | -                       |
| <b>Gram-negative bacteria</b>       |            |                          |                         |                                                           |               |                              |                         |
| <i>Escherichia coli</i>             | 411        | -                        | -                       | 411                                                       | 378           | 310                          | 4                       |
| <i>Klebsiella pneumoniae</i>        | 102        | -                        | -                       | 102                                                       | 85            | 78                           | 6                       |
| <i>Enterobacter cloacae</i> complex | 26         | -                        | -                       | 26                                                        | 11            | 2                            | 2                       |
| <i>Citrobacter freundii</i>         | 18         | -                        | -                       | 18                                                        | 7             | 6                            | 1                       |
| <i>Pseudomonas aeruginosa</i>       | 9          | -                        | -                       | 9                                                         | 2             | 9                            | 3                       |
| <i>Acinetobacter baumannii</i>      | 2          | -                        | -                       | 2                                                         | 0             | 2                            | 2                       |
| <i>Enterobacter aerogenes</i>       | 2          | -                        | -                       | 2                                                         | 0             | 0                            | 0                       |
| <i>Klebsiella oxytoca</i>           | 8          | -                        | -                       | 8                                                         | 6             | 2                            | 0                       |
| <i>Morganella morganii</i>          | 2          | -                        | -                       | 2                                                         | 0             | 2                            | 0                       |
| <i>Proteus mirabilis</i>            | 2          | -                        | -                       | 2                                                         | 1             | 2                            | 0                       |
| <i>Raoultella planticola</i>        | 1          | -                        | -                       | 1                                                         | 0             | 1                            | 0                       |
| <i>Serratia marcescens</i>          | 1          | -                        | -                       | 1                                                         | 0             | 1                            | 0                       |
| Other <i>Citrobacter</i> species    | 6          | -                        | -                       | 6                                                         | 1             | 1                            | 0                       |
| <b>Sum</b>                          | <b>985</b> | <b>118</b>               | <b>277</b>              | <b>590</b>                                                | <b>491</b>    | <b>416</b>                   | <b>18</b>               |

**Table S3** – Complete univariable analysis of matched group of MRSA-positives and MRSA-negatives. N = available data sets included for each characteristic, OR = Odds Ratio, 95% CI = 95% Confidence interval. BMI = Body Mass Index, CCI = Charlson Comorbidity Index, \*Median (Interquartile range (IQR)), NA = not available. † Pets = dogs and/or cats, NA = not available due to low number of events.

| Characteristic                            | N   | MRSA-Positive,<br>N = 117 | MRSA-Negative,<br>N = 234 | OR     | 95% CI          | p-value |
|-------------------------------------------|-----|---------------------------|---------------------------|--------|-----------------|---------|
| Sex (male)                                | 351 | 73 (62%)                  | 139 (59%)                 | 1.124  | 0.723, 1.745    | 0.604   |
| Age*                                      | 351 | 64 (50, 76)               | 60 (46, 73)               | 1.010  | 0.998, 1.023    | 0.100   |
| BMI*                                      | 351 | 24.0<br>(22.0, 27.5)      | 24.7<br>(21.7, 28.6)      | 0.996  | 0.958, 1.035    | 0.845   |
| CCI*                                      | 350 | 5 (2, 8)                  | 4 (1, 7)                  | 1.044  | 0.982, 1.110    | 0.167   |
| Diet                                      | 351 |                           |                           |        |                 |         |
| Mixed diet                                |     | 114 (97%)                 | 217 (93%)                 | 1      | -               | -       |
| Vegetarian                                |     | 0 (0%)                    | 11 (4.7%)                 | NA     | NA              | NA      |
| Vegan                                     |     | 1 (0.9%)                  | 1 (0.4%)                  | 2.000  | 0.125, 31.975   | 0.624   |
| Others                                    |     | 2 (1.7%)                  | 5 (2.1%)                  | 0.800  | 0.155, 4.123    | 0.790   |
| Living situation                          | 351 |                           |                           |        |                 |         |
| Family/shared flat                        |     | 74 (63%)                  | 162 (69%)                 | 1      | -               | -       |
| Alone                                     |     | 39 (33%)                  | 68 (29%)                  | 1.229  | 0.752, 2.008    | 0.410   |
| Nursing Home                              |     | 4 (3.4%)                  | 3 (1.3%)                  | 2.751  | 0.614, 12.322   | 0.186   |
| Others                                    |     | 0 (0%)                    | 1 (0.4%)                  | NA     | NA              | NA      |
| Prior hospitalization                     | 349 | 79 (68%)                  | 128 (55%)                 | 1.871  | 1.131, 3.096    | 0.015   |
| Prior antibiotic use                      | 336 | 71 (61%)                  | 85 (36%)                  | 2.596  | 1.619, 4.162    | <0.001  |
| Travel within Europe                      | 351 | 10 (8.5%)                 | 30 (13%)                  | 0.647  | 0.309, 1.355    | 0.248   |
| Travel to Asia                            | 351 | 6 (5.1%)                  | 8 (3.4%)                  | 1.618  | 0.505, 5.185    | 0.418   |
| Travel to North America                   | 351 | 3 (2.6%)                  | 2 (0.9%)                  | 3.000  | 0.501, 17.954   | 0.229   |
| Travel to South America                   | 351 | 3 (2.6%)                  | 2 (0.9%)                  | 3.000  | 0.501, 17.954   | 0.229   |
| Travel to Africa                          | 351 | 2 (1.7%)                  | 2 (0.9%)                  | 2.000  | 0.282, 14.198   | 0.488   |
| Travel to Australia/New Zealand           | 351 | 0 (0.0%)                  | 2 (0.9%)                  | NA     | NA              | NA      |
| Urinary tract catheter                    | 351 | 9 (7.7%)                  | 16 (6.8%)                 | 1.144  | 0.477, 2.740    | 0.763   |
| Central venous catheter                   | 351 | 29 (25%)                  | 34 (15%)                  | 2.289  | 1.214, 4.319    | 0.011   |
| Prior MDR-GNB colonization                | 304 | 3 (2.6%)                  | 5 (2.1%)                  | 1.500  | 0.336, 6.702    | 0.595   |
| Prior MRSA colonization                   | 305 | 48 (41%)                  | 5 (2.1%)                  | 86.098 | 11.870, 624.510 | <0.001  |
| Prior VRE colonization                    | 305 | 1 (0.9%)                  | 5 (2.1%)                  | 0.549  | 0.056, 5.392    | 0.607   |
| Diarrhea                                  | 348 | 31 (26%)                  | 54 (23%)                  | 1.179  | 0.702, 1.981    | 0.533   |
| Pet ownership†                            | 351 | 18 (15.4%)                | 55 (23.5%)                | 0.58   | 0.32, 1.06      | 0.075   |
| Dog ownership                             | 351 | 12 (10%)                  | 31 (13%)                  | 0.745  | 0.365, 1.518    | 0.417   |
| Cat ownership                             | 351 | 7 (6.0%)                  | 30 (13%)                  | 0.432  | 0.183, 1.017    | 0.055   |
| Ownership of other pets                   | 351 | 4 (3.4%)                  | 12 (5.1%)                 | 0.632  | 0.191, 2.092    | 0.453   |
| Regular contact to pets of others         | 351 | 3 (2.6%)                  | 14 (6.0%)                 | 0.429  | 0.123, 1.491    | 0.183   |
| Number of dogs                            | 351 |                           |                           |        |                 |         |
| 0                                         |     | 105 (90%)                 | 203 (87%)                 | 1      | -               | -       |
| 1                                         |     | 11 (9.4%)                 | 27 (12%)                  | 0.761  | 0.364, 1.594    | 0.470   |
| 2                                         |     | 0 (0%)                    | 4 (1.7%)                  | NA     | NA              | NA      |
| 3 or more                                 |     | 1 (0.9%)                  | 0 (0%)                    | NA     | NA              | NA      |
| Number of cats                            | 351 |                           |                           |        |                 |         |
| 0                                         |     | 110 (94%)                 | 204 (87%)                 | 1      | -               | -       |
| 1                                         |     | 5 (4.3%)                  | 21 (9.0%)                 | 0.448  | 0.168, 1.194    | 0.109   |
| 2                                         |     | 1 (0.9%)                  | 5 (2.1%)                  | 0.356  | 0.041, 3.071    | 0.348   |
| 3 or more                                 |     | 1 (0.9%)                  | 4 (1.7%)                  | 0.436  | 0.048, 3.936    | 0.460   |
| Professional contact to livestock or pets | 350 | 6 (5.2%)                  | 15 (6.4%)                 | 0.791  | 0.301, 2.084    | 0.636   |
| Heart disease                             | 349 | 16 (14%)                  | 19 (8.2%)                 | 1.979  | 0.901, 4.346    | 0.089   |
| Cerebrovascular disease                   | 349 | 11 (9.5%)                 | 17 (7.3%)                 | 1.391  | 0.588, 3.291    | 0.453   |
| Neurologic disease                        | 349 | 8 (6.9%)                  | 4 (1.7%)                  | 4.000  | 1.205, 13.283   | 0.024   |
| Lung disease                              | 349 | 9 (7.8%)                  | 26 (11%)                  | 0.655  | 0.292, 1.470    | 0.305   |
| Rheumatic disease                         | 349 | 5 (4.3%)                  | 9 (3.9%)                  | 1.120  | 0.360, 3.490    | 0.845   |
| Gastrointestinal disease                  | 349 | 1 (0.9%)                  | 0 (0%)                    | NA     | NA              | NA      |
| Liver disease                             | 349 | 9 (7.8%)                  | 9 (3.9%)                  | 2.099  | 0.802, 5.490    | 0.131   |
| Diabetes                                  | 349 | 20 (17%)                  | 29 (12%)                  | 1.412  | 0.769, 2.590    | 0.266   |

| Characteristic               | N   | MRSA-Positive,<br>N = 117 | MRSA-Negative,<br>N = 234 | OR    | 95% CI       | p-value |
|------------------------------|-----|---------------------------|---------------------------|-------|--------------|---------|
| Renal disease                | 349 | 37 (32%)                  | 61 (26%)                  | 1.334 | 0.799, 2.230 | 0.271   |
| Cancer/immunological disease | 349 | 49 (42%)                  | 86 (37%)                  | 1.267 | 0.780, 2.060 | 0.339   |

**Table S4** - Complete univariable analysis of matched group of VRE-positives and VRE-negatives. N = number of data sets included for each characteristic, OR = Odds Ratio, 95% CI = 95% Confidence interval. BMI = Body Mass Index, CCI = Charlson Comorbidity Index, N = available data sets for each characteristic, \*Median (Interquartile range (IQR)). † Pets = dogs and/or cats, NA = not available due to low number of events.

| Characteristic                            | N   | VRE-Positive,<br>N = 275 | VRE-Negative,<br>N = 550 | OR     | 95% CI        | p-value |
|-------------------------------------------|-----|--------------------------|--------------------------|--------|---------------|---------|
| Sex (male)                                | 825 | 172 (63%)                | 300 (55%)                | 1.392  | 1.034, 1.875  | 0.029   |
| Age*                                      | 825 | 66 (55, 73)              | 62 (53, 71)              | 1.014  | 1.004, 1.024  | 0.007   |
| BMI*                                      | 825 | 24.1<br>(21.1, 27.8)     | 25.1<br>(21.8, 28.4)     | 0.971  | 0.945, 0.998  | 0.036   |
| CCI*                                      | 823 | 5 (3, 7)                 | 4 (2, 7)                 | 1.058  | 1.016, 1.102  | 0.006   |
| Diet                                      | 822 |                          |                          |        |               |         |
| Mixed diet                                |     | 258 (95%)                | 510 (93%)                | 1      | -             | -       |
| Vegetarian                                |     | 6 (2.2%)                 | 24 (4.4%)                | 0.499  | 0.198, 1.257  | 0.140   |
| Vegan                                     |     | 2 (0.7%)                 | 3 (0.5%)                 | 1.333  | 0.223, 7.980  | 0.753   |
| Others                                    |     | 6 (2.2%)                 | 13 (2.4%)                | 0.904  | 0.335, 2.441  | 0.842   |
| Living situation                          | 823 |                          |                          |        |               |         |
| Family/shared flat                        |     | 193 (71%)                | 386 (70%)                | 1      | -             | -       |
| Alone                                     |     | 69 (25%)                 | 158 (29%)                | 0.846  | 0.607, 1.181  | 0.326   |
| Nursing Home                              |     | 9 (3.3%)                 | 5 (0.9%)                 | 3.519  | 1.178, 10.512 | 0.024   |
| Others                                    |     | 2 (0.7%)                 | 1 (0.2%)                 | 3.896  | 0.353, 4.3001 | 0.267   |
| Prior hospitalization                     | 820 | 241 (88%)                | 368 (67%)                | 3.921  | 2.533, 6.069  | <0.001  |
| Prior antibiotic use                      | 762 | 188 (68%)                | 206 (38%)                | 5.111  | 3.460, 7.550  | <0.001  |
| Travel within Europe                      | 825 | 27 (9.8%)                | 70 (13%)                 | 0.748  | 0.468, 1.195  | 0.224   |
| Travel to Asia                            | 824 | 6 (2.2%)                 | 18 (3.3%)                | 0.644  | 0.247, 1.681  | 0.369   |
| Travel to North America                   | 824 | 3 (1.1%)                 | 5 (0.9%)                 | 1.200  | 0.287, 5.021  | 0.803   |
| Travel to South America                   | 824 | 3 (1.1%)                 | 5 (0.9%)                 | 1.200  | 0.287, 5.021  | 0.803   |
| Travel to Africa                          | 824 | 1 (0.4%)                 | 4 (0.7%)                 | 0.500  | 0.056, 4.473  | 0.535   |
| Travel to Australia/New Zealand           | 824 | 0 (0.0%)                 | 0 (0.0%)                 | NA     | NA            | NA      |
| Urinary tract catheter                    | 824 | 36 (13%)                 | 42 (7.7%)                | 2.217  | 1.275, 3.853  | 0.005   |
| Central venous catheter                   | 824 | 99 (36%)                 | 152 (28%)                | 1.619  | 1.141, 2.297  | 0.007   |
| Prior MDR-GNB colonization                | 654 | 11 (4.0%)                | 8 (1.5%)                 | 3.922  | 1.353, 11.365 | 0.012   |
| Prior MRSA colonization                   | 654 | 10 (3.7%)                | 4 (0.7%)                 | 4.893  | 1.310, 18.280 | 0.018   |
| Prior VRE colonization                    | 652 | 33 (12%)                 | 12 (2.2%)                | 10.164 | 3.924, 26.329 | <0.001  |
| Diarrhea                                  | 818 | 109 (40%)                | 141 (26%)                | 2.064  | 1.487, 2.866  | <0.001  |
| Pet ownership†                            | 825 | 49 (17.8%)               | 131 (23.8%)              | 0.69   | 0.48, 1.00    | 0.050   |
| Dog ownership                             | 825 | 27 (9.8%)                | 80 (15%)                 | 0.632  | 0.396, 1.011  | 0.056   |
| Cat ownership                             | 825 | 30 (11%)                 | 67 (12%)                 | 0.883  | 0.559, 1.394  | 0.594   |
| Ownership of other pets                   | 825 | 14 (5.1%)                | 27 (4.9%)                | 1.038  | 0.540, 1.996  | 0.911   |
| Regular contact to pets of others         | 823 | 11 (4.0%)                | 29 (5.3%)                | 0.748  | 0.368, 1.522  | 0.424   |
| Number of dogs                            | 825 |                          |                          |        |               |         |
| 0                                         |     | 249 (91%)                | 470 (85%)                | 1      | -             | -       |
| 1                                         |     | 25 (9.1%)                | 70 (13%)                 | 0.659  | 0.406, 1.071  | 0.092   |
| 2                                         |     | 0 (0%)                   | 8 (1.5%)                 | NA     | NA            | NA      |
| 3 or more                                 |     | 1 (0.4%)                 | 2 (0.4%)                 | 0.938  | 0.085, 10.381 | 0.959   |
| Number of cats                            | 825 |                          |                          |        |               |         |
| 0                                         |     | 246 (89%)                | 484 (88%)                | 1      | -             | -       |
| 1                                         |     | 22 (8.0%)                | 43 (7.8%)                | 1.003  | 0.592, 1.702  | 0.990   |
| 2                                         |     | 6 (2.2%)                 | 13 (2.4%)                | 0.923  | 0.350, 2.436  | 0.872   |
| 3 or more                                 |     | 1 (0.4%)                 | 10 (1.8%)                | 0.200  | 0.026, 1.564  | 0.125   |
| Professional contact to livestock or pets | 822 | 15 (5.5%)                | 37 (6.7%)                | 0.794  | 0.423, 1.488  | 0.471   |

| Characteristic               | N   | VRE-Positive, | VRE-Negative, | OR    | 95% CI       | p-value |
|------------------------------|-----|---------------|---------------|-------|--------------|---------|
|                              |     | N = 275       | N = 550       |       |              |         |
| Heart disease                | 823 | 29 (11%)      | 38 (6.9%)     | 1.627 | 0.965, 2.745 | 0.068   |
| Cerebrovascular disease      | 823 | 22 (8.0%)     | 27 (4.9%)     | 1.711 | 0.945, 3.099 | 0.076   |
| Neurologic disease           | 823 | 6 (2.2%)      | 6 (1.1%)      | 2.156 | 0.647, 7.190 | 0.211   |
| Lung disease                 | 823 | 25 (9.1%)     | 50 (9.1%)     | 1.000 | 0.590, 1.696 | >0.900  |
| Rheumatic disease            | 823 | 9 (3.3%)      | 14 (2.6%)     | 1.259 | 0.533, 2.976 | 0.600   |
| Gastrointestinal disease     | 823 | 4 (1.5%)      | 5 (0.9%)      | 1.600 | 0.430, 5.958 | 0.484   |
| Liver disease                | 823 | 22 (8.0%)     | 28 (5.1%)     | 1.642 | 0.912, 2.955 | 0.098   |
| Diabetes                     | 823 | 43 (16%)      | 77 (14%)      | 1.140 | 0.759, 1.711 | 0.529   |
| Renal disease                | 823 | 82 (30%)      | 110 (20%)     | 1.714 | 1.222, 2.404 | 0.002   |
| Cancer/immunological disease | 823 | 148 (54%)     | 293 (44%)     | 1.662 | 1.203, 2.295 | 0.002   |

**Table S5** - Complete univariable analysis of matched group of MDR-GNB-positives and MDR-GNB-negatives. N = number of data sets included for each characteristic, OR = Odds Ratio, 95% CI = 95% Confidence interval. BMI = Body Mass Index, CCI = Charlson Comorbidity Index, N = available data sets for each characteristic, \*Median (Interquartile range (IQR)). † Pets = dogs and/or cats, NA = not available due to low number of events.

| Characteristic                    | N    | MDR-GNB-Positive, | MDR-GNB-Negative, | OR     | 95% CI        | p-value |
|-----------------------------------|------|-------------------|-------------------|--------|---------------|---------|
|                                   |      | N = 534           | N = 1,068         |        |               |         |
| Sex (male)                        | 1602 | 301 (56%)         | 560 (52%)         | 1.175  | 0.952, 1.451  | 0.133   |
| Age*                              | 1602 | 65 (53, 74)       | 61 (50, 71)       | 1.014  | 1.007, 1.021  | <0.001  |
| BMI*                              | 1602 | 24.5 (21.6, 28.7) | 25.1 (22.0, 28.7) | 0.991  | 0.973, 1.010  | 0.367   |
| CCI*                              | 1592 | 4 (2, 7)          | 4 (2, 6)          | 1.033  | 1.003, 1.065  | 0.032   |
| Diet                              | 1601 |                   |                   |        |               |         |
| Mixed diet                        |      | 515 (97%)         | 1,016 (95%)       | 1      | -             | -       |
| Vegetarian                        |      | 12 (2.3%)         | 41 (3.8%)         | 0.574  | 0.300, 1.099  | 0.094   |
| Vegan                             |      | 3 (0.6%)          | 1 (<0.1%)         | 6.000  | 0.624, 57.681 | 0.121   |
| Others                            |      | 3 (0.6%)          | 10 (0.9%)         | 0.577  | 0.159, 2.100  | 0.404   |
| Living situation                  | 1601 |                   |                   |        |               |         |
| Family/shared flat                |      | 382 (72%)         | 768 (72%)         | 1      | -             | -       |
| Alone                             |      | 142 (27%)         | 292 (27%)         | 0.979  | 0.776, 1.236  | 0.859   |
| Nursing Home                      |      | 7 (1.3%)          | 7 (0.7%)          | 1.988  | 0.696, 5.679  | 0.200   |
| Others                            |      | 2 (0.4%)          | 1 (<0.1%)         | 3.986  | 0.361, 43.972 | 0.259   |
| Prior hospitalization             | 1596 | 372 (70%)         | 628 (59%)         | 1.703  | 1.342, 2.161  | <0.001  |
| Prior antibiotic use              | 1504 | 318 (60%)         | 348 (33%)         | 4.317  | 3.305, 5.639  | <0.001  |
| Travel within Europe              | 1601 | 79 (15%)          | 171 (16%)         | 0.910  | 0.680, 1.217  | 0.525   |
| Travel to Asia                    | 1601 | 34 (6.4%)         | 38 (3.6%)         | 1.806  | 1.132, 2.881  | 0.013   |
| Travel to North America           | 1601 | 7 (1.3%)          | 9 (0.8%)          | 1.556  | 0.579, 4.177  | 0.381   |
| Travel to South America           | 1601 | 7 (1.3%)          | 9 (0.8%)          | 1.556  | 0.579, 4.177  | 0.381   |
| Travel to Africa                  | 1601 | 7 (1.3%)          | 8 (0.7%)          | 1.832  | 0.634, 5.292  | 0.264   |
| Travel to Australia/New Zealand   | 1601 | 0 (0.0%)          | 0 (0.0%)          | NA     | NA            | NA      |
| Urinary tract catheter            | 1600 | 80 (15%)          | 70 (6.6%)         | 2.849  | 1.963, 4.133  | <0.001  |
| Central venous catheter           | 1600 | 148 (28%)         | 222 (21%)         | 1.651  | 1.248, 2.185  | <0.001  |
| Prior MDR-GNB colonization        | 1334 | 91 (17%)          | 32 (3.0%)         | 10.467 | 5.931, 18.473 | <0.001  |
| Prior MRSA colonization           | 1332 | 8 (1.5%)          | 13 (1.2%)         | 1.761  | 0.655, 4.733  | 0.262   |
| Prior VRE colonization            | 1332 | 10 (1.9%)         | 18 (1.7%)         | 1.207  | 0.519, 2.806  | 0.662   |
| Diarrhea                          | 1594 | 169 (32%)         | 302 (28%)         | 1.197  | 0.947, 1.513  | 0.133   |
| Pet ownership†                    | 1602 | 99 (18.5%)        | 248 (23.2%)       | 0.75   | 0.57, 0.97    | 0.030   |
| Dog ownership                     | 1602 | 61 (11%)          | 137 (13%)         | 0.875  | 0.634, 1.209  | 0.419   |
| Cat ownership                     | 1602 | 48 (9.0%)         | 134 (13%)         | 0.684  | 0.481, 0.972  | 0.034   |
| Ownership of other pets           | 1602 | 23 (4.3%)         | 43 (4.0%)         | 1.077  | 0.633, 1.833  | 0.784   |
| Regular contact to pets of others | 1601 | 21 (3.9%)         | 77 (7.2%)         | 0.536  | 0.329, 0.874  | 0.012   |

| <b>Characteristic</b>                        | <b>N</b> | <b>MDR-GNB-<br/>Positive,<br/>N = 534</b> | <b>MDR-GNB-<br/>Negative,<br/>N = 1,068</b> | <b>OR</b> | <b>95% CI</b> | <b>p-<br/>value</b> |
|----------------------------------------------|----------|-------------------------------------------|---------------------------------------------|-----------|---------------|---------------------|
| Number of dogs                               | 1602     |                                           |                                             |           |               |                     |
| 0                                            |          | 473 (89%)                                 | 931 (87%)                                   | 1         | -             | -                   |
| 1                                            |          | 54 (10%)                                  | 111 (10%)                                   | 0.957     | 0.680, 1.345  | 0.799               |
| 2                                            |          | 7 (1.3%)                                  | 21 (2.0%)                                   | 0.652     | 0.273, 1.558  | 0.335               |
| 3 or more                                    |          | 0 (0%)                                    | 5 (0.5%)                                    | NA        | NA            | NA                  |
| Number of cats                               | 1602     |                                           |                                             |           |               |                     |
| 0                                            |          | 487 (91%)                                 | 934 (87%)                                   | 1         | -             | -                   |
| 1                                            |          | 30 (5.6%)                                 | 102 (9.6%)                                  | 0.566     | 0.370, 0.866  | 0.009               |
| 2                                            |          | 11 (2.1%)                                 | 27 (2.5%)                                   | 0.773     | 0.379, 1.573  | 0.477               |
| 3 or more                                    |          | 6 (1.1%)                                  | 5 (0.5%)                                    | 2.185     | 0.663, 7.201  | 0.199               |
| Professional contact to<br>livestock or pets | 1599     | 26 (4.9%)                                 | 59 (5.5%)                                   | 0.870     | 0.537, 1.411  | 0.573               |
| Heart disease                                | 1591     | 46 (8.7%)                                 | 88 (8.3%)                                   | 1.051     | 0.720, 1.536  | 0.795               |
| Cerebrovascular disease                      | 1591     | 40 (7.6%)                                 | 57 (5.4%)                                   | 1.444     | 0.947, 2.203  | 0.088               |
| Neurologic disease                           | 1591     | 11 (2.1%)                                 | 14 (1.3%)                                   | 1.528     | 0.693, 3.372  | 0.294               |
| Lung disease                                 | 1591     | 31 (5.9%)                                 | 86 (8.1%)                                   | 0.708     | 0.463, 1.083  | 0.112               |
| Rheumatic disease                            | 1591     | 16 (3.0%)                                 | 29 (2.7%)                                   | 1.127     | 0.575, 2.208  | 0.727               |
| Gastrointestinal disease                     | 1591     | 6 (1.1%)                                  | 10 (0.9%)                                   | 1.200     | 0.436, 3.302  | 0.724               |
| Liver disease                                | 1591     | 27 (5.1%)                                 | 61 (5.7%)                                   | 0.871     | 0.546, 1.388  | 0.561               |
| Diabetes                                     | 1591     | 88 (17%)                                  | 166 (16%)                                   | 1.065     | 0.802, 1.413  | 0.663               |
| Renal disease                                | 1591     | 163 (31%)                                 | 222 (21%)                                   | 1.683     | 1.328, 2.134  | <0.001              |
| Cancer/immunological disease                 | 1591     | 207 (39%)                                 | 399 (38%)                                   | 1.100     | 0.865, 1.399  | 0.436               |

**Figure S6** Directed acyclic graphs (DAGs) of minimal sufficient adjustment sets constructed for the analysis of the exposure (E) pet ownership on the outcomes (O) MRSA colonization (A), VRE colonization (B) and MDR-GNB colonization (C) based on literature findings (19-31). Authors illustration based on output created in DAGitty software (17).

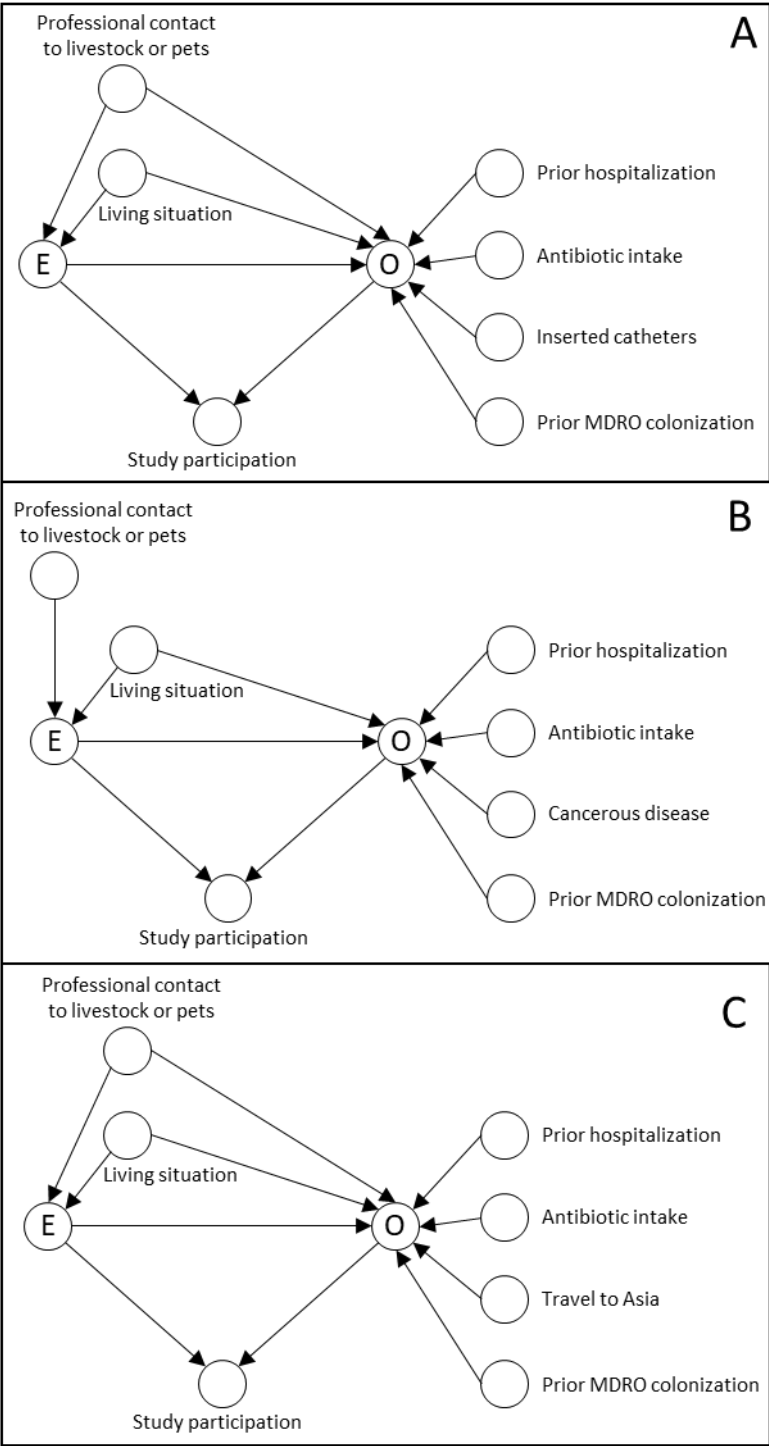

**Table S7** - Multivariable analyses of all three compared groups, based on type of pathogen. Analyses were performed based on prospectively modelled DAGs. We analyzed pet ownership adjusted for age and sex of the participant as well as potential confounders identified in DAGs, which were living situation and professional contact to livestock or pets for MRSA and MDR-GNB, as well as living situation for VRE. In the sensitivity analyses at hand, the most relevant risk factors for each type of MDRO are included in the analyses. They are prior hospitalization and prior antibiotic use for MRSA, VRE and MDR-GNB, travel to Asia for MDR-GNB, cancerous diseases for VRE and inserted catheters for MRSA. Prior colonization with MDROs was not included in these analyses, since we identified a bias in patient recruitment for these variables. We specifically approached patients with a known history of MDRO carriage, therefore we cannot include it as an independent risk factor. \*Family/shared flat = reference, OR = Odds Ratio, 95% CI = 95% Confidence interval, NA = not available due to low number of events. Statistically significant results are highlighted (bold). Sensitivity analyses without matching and matching without the multiple use of controls lead to similar results. We do not expect multiple use of controls in matching to have influenced the results.

| Characteristic                            | MRSA                    |                               |                         | VRE                     |                               |                             | MDR-GNB                 |                               |                             |
|-------------------------------------------|-------------------------|-------------------------------|-------------------------|-------------------------|-------------------------------|-----------------------------|-------------------------|-------------------------------|-----------------------------|
|                                           | OR                      | 95% CI                        | p-value                 | OR                      | 95% CI                        | p-value                     | OR                      | 95% CI                        | p-value                     |
| Pet ownership                             | 0.85<br>3               | 0.415,<br>1.756               | 0.66<br>7               | 0.89<br>1               | 0.569, 1.394                  | 0.612                       | <b>0.68</b><br><b>5</b> | <b>0.498,</b><br><b>0.943</b> | <b>0.02</b><br><b>0</b>     |
| Age (median)                              | 1.00<br>4               | 0.989,<br>1.019               | 0.60<br>7               | 1.00<br>9               | 0.977, 1.021                  | 0.146                       | <b>1.01</b><br><b>2</b> | <b>1.004,</b><br><b>1.020</b> | <b>0.00</b><br><b>5</b>     |
| Sex (male)                                | 1.10<br>7               | 0.674,<br>1.817               | 0.68<br>8               | 1.25<br>1               | 0.863, 1.813                  | 0.237                       | 1.257                   | 0.981,<br>1.612               | 0.070                       |
| Living situation                          |                         |                               |                         |                         |                               |                             |                         |                               |                             |
| Family/shared flat*                       | 1                       | -                             | -                       | 1                       | -                             | -                           | 1                       | -                             | -                           |
| Alone                                     | 1.32<br>1               | 0.735,<br>2.375               | 0.35<br>2               | 0.92<br>8               | 0.605, 1.423                  | 0.731                       | 0.976<br>2.325          | 0.738,<br>1.289               | 0.863<br>0.234              |
| Nursing home                              | 2.11                    | 0.401,                        | 0.37                    | 1.32                    | 0.045, 18.725                 | 0.956                       | 1.787                   | 0.580,                        | 0.716                       |
| Others                                    | 8<br>NA                 | 11.177<br>NA                  | 6<br>NA                 | 1<br>0.91<br>9          |                               |                             |                         | 9.326<br>0.078,<br>40.808     |                             |
| Prior hospitalization                     | 1.35<br>7               | 0.764,<br>2.411               | 0.29<br>8               | <b>2.7</b><br><b>08</b> | <b>1.668,</b><br><b>4.397</b> | <b>&lt;0.0</b><br><b>01</b> | 1.254                   | 0.940,<br>1.674               | 0.124                       |
| Prior antibiotic use                      | <b>2.2</b><br><b>19</b> | <b>1.342,</b><br><b>3.667</b> | <b>0.0</b><br><b>02</b> | <b>4.1</b><br><b>09</b> | <b>2.727,</b><br><b>6.192</b> | <b>&lt;0.0</b><br><b>01</b> | <b>4.41</b><br><b>4</b> | <b>3.311,</b><br><b>5.886</b> | <b>&lt;0.0</b><br><b>01</b> |
| Travel to Asia                            | -                       | -                             | -                       | -                       | -                             | -                           | <b>2.40</b><br><b>3</b> | <b>1.408,</b><br><b>4.101</b> | <b>0.00</b><br><b>1</b>     |
| Professional contact to livestock or pets | 0.95<br>4               | 0.295,<br>3.090               | 0.93<br>8               | -                       | -                             | -                           | 1.129                   | 0.641,<br>1.990               | 0.674                       |
| Urinary tract catheter                    | 0.94<br>0               | 0.354,<br>2.496               | 0.90<br>1               | -                       | -                             | -                           | -                       | -                             | -                           |
| Central venous catheter                   | 1.76<br>3               | 0.852,<br>3.648               | 0.12<br>6               | -                       | -                             | -                           | -                       | -                             | -                           |
| Cancer                                    | -                       | -                             | -                       | <b>1.6</b><br><b>59</b> | <b>1.109,</b><br><b>2.482</b> | <b>0.01</b><br><b>4</b>     | -                       | -                             | -                           |



**Table S8**– Complete comparison of pet owners and non-pet owners in this study group, based on p-value (Pearson's Chi-squared test, Fisher's exact test or Wilcoxon rank sum test). N = number of data sets included for each characteristic, \*Median (Interquartile range (IQR)), BMI = Body Mass Index, CCI = Charlson Comorbidity Index.

| <b>Characteristic</b>                     | <b>N</b> | <b>Pet ownership,<br/>N = 626</b> | <b>Non-pet<br/>ownership,<br/>N = 2,264</b> | <b>p-value</b> |
|-------------------------------------------|----------|-----------------------------------|---------------------------------------------|----------------|
| MDRO colonization                         | 2,890    | 154 (25%)                         | 717 (32%)                                   | 0.001          |
| MRSA colonization                         | 2,890    | 18 (2.9%)                         | 100 (4.4%)                                  | 0.085          |
| VRE colonization                          | 2,890    | 48 (7.7%)                         | 227 (10%)                                   | 0.075          |
| MDR-GNB colonization                      | 2,890    | 99 (16%)                          | 444 (20%)                                   | 0.031          |
| Sex (male)                                | 2,890    | 313 (50%)                         | 1,294 (57%)                                 | 0.001          |
| Age*                                      | 2,890    | 56 (46, 65)                       | 65 (53, 74)                                 | <0.001         |
| BMI*                                      | 2,890    | 25.5 (22.1, 29.1)                 | 24.8 (21.9, 28.7)                           | 0.090          |
| CCI*                                      | 2,875    | 3.0 (1.0, 6.0)                    | 4.0 (2.0, 7.0)                              | 0.001          |
| Diet                                      | 2,887    |                                   |                                             | 0.332          |
| Mixed diet                                |          | 590 (94%)                         | 2,156 (95%)                                 |                |
| Vegetarian                                |          | 27 (4.3%)                         | 72 (3.2%)                                   |                |
| Vegan                                     |          | 4 (0.6%)                          | 8 (0.4%)                                    |                |
| Others                                    |          | 5 (0.8%)                          | 25 (1.1%)                                   |                |
| Living situation                          | 2,887    |                                   |                                             | <0.001         |
| Family/shared flat                        |          | 522 (83%)                         | 1,519 (67%)                                 |                |
| Alone                                     |          | 103 (16%)                         | 701 (31%)                                   |                |
| Nursing Home                              |          | 1 (0.2%)                          | 36 (1.6%)                                   |                |
| Others                                    |          | 0 (0%)                            | 5 (0.2%)                                    |                |
| Prior hospitalization                     | 2,886    | 383 (61%)                         | 1,380 (61%)                                 | 0.870          |
| Prior antibiotic use                      | 2,889    | 271 (43%)                         | 915 (40%)                                   | 0.390          |
| Travel within Europe                      | 2,889    | 93 (15%)                          | 310 (14%)                                   | 0.459          |
| Travel to Asia                            | 2,888    | 18 (2.9%)                         | 84 (3.7%)                                   | 0.315          |
| Travel to North America                   | 2,888    | 3 (0.5%)                          | 21 (0.9%)                                   | 0.273          |
| Travel to South America                   | 2,888    | 3 (0.5%)                          | 21 (0.9%)                                   | 0.273          |
| Travel to Africa                          | 2,888    | 4 (0.6%)                          | 20 (0.9%)                                   | 0.550          |
| Travel to Australia/New Zealand           | 2,888    | 0 (0%)                            | 2 (<0.1%)                                   | >0.9           |
| Urinary tract catheter                    | 2,887    | 57 (9.1%)                         | 234 (10%)                                   | 0.360          |
| Central venous catheter                   | 2,887    | 123 (20%)                         | 489 (22%)                                   | 0.284          |
| Prior MDR-GNB colonization                | 2,433    | 28 (4.5%)                         | 120 (5.3%)                                  | 0.458          |
| Prior MRSA colonization                   | 2,432    | 14 (2.2%)                         | 756(3.4%)                                   | 0.274          |
| Prior VRE colonization                    | 2,431    | 17 (2.7%)                         | 52 (2.3%)                                   | 0.635          |
| Diarrhea                                  | 2,888    | 197 (31%)                         | 573 (25%)                                   | 0.004          |
| Heart disease                             | 2,875    | 39 (6.2%)                         | 218 (9.7%)                                  | 0.008          |
| Cerebrovascular disease                   | 2,875    | 30 (4.8%)                         | 165 (7.3%)                                  | 0.027          |
| Neurologic disease                        | 2,875    | 10 (1.6%)                         | 41 (1.8%)                                   | 0.714          |
| Lung disease                              | 2,875    | 50 (8.0%)                         | 201 (8.9%)                                  | 0.473          |
| Rheumatic disease                         | 2,875    | 21 (3.4%)                         | 81 (3.6%)                                   | 0.781          |
| Gastrointestinal disease                  | 2,875    | 6 (1.0%)                          | 18 (0.8%)                                   | 0.694          |
| Liver disease                             | 2,875    | 45 (7.2%)                         | 118 (5.2%)                                  | 0.060          |
| Diabetes                                  | 2,875    | 89 (14%)                          | 361 (16%)                                   | 0.280          |
| Renal disease                             | 2,875    | 134 (21%)                         | 538 (24%)                                   | 0.205          |
| Cancer/immunological disease              | 2,875    | 239 (38%)                         | 834 (37%)                                   | 0.567          |
| Regular contact to pets of others         | 2,887    | 34 (5.4%)                         | 124 (5.5%)                                  | >0.9           |
| Ownership of pets other than dogs/cats    | 2,890    | 43 (6.9%)                         | 72 (3.2%)                                   | <0.001         |
| Professional contact to livestock or pets | 2,881    | 91 (15%)                          | 72 (3.2%)                                   | <0.001         |
